# Supplementary material
Source: publisher figshare collection journal article supplement (https://sage.figshare.com/ndownloader/files/23454506)
Supplement: Supplementary file 1 [file 23454506]

	Gene	Function	Supportability	Entrez Gene ID	hsa-u.2 for DAB2IP	hsa-m.6 for DAB2IP	hsa-m2.3 for DAB2IP	hsa-r.4 for DAB2IP	hsa-u.2 for SYNGAP1	hsa-u.2 for RASAL3	hsa-u.2 for RASAL2	mcc-u.2 for DAB2IP	mcc-u.2 for RASAL2	mcc-u.2 for SYNGAP1	mmu-u.2 for Dab2ip	mmu-u.2 for Syngap1	mmu-u.2 for Rasal2	rno-u.2 for Dab2ip	rno-u.2 for Syngap1	rno-u.2 for Rasal2	cfa-u.2 for RASAL2	cfa-u.2 for DAB2IP	cfa-u.2 for SYNGAP1	gga-u.2 for RASAL2	gga-u.2 for DAB2IP	gga-u.2 for RASAL3	dre-u.2 for syngap1b	dre-u.2 for syngap1a	dre-u.2 for dab2ipa	dme-u.2 for CG42684	cel-u.2 for gap-2	sce-u.2 for BUD2
0	DAB2IP	DAB2 interacting protein	2	153090	0	0	0	0	0	0	0	0	0	0	0	0	0	0	0	0	0	0	0	0	0	0	0	0	0	0	0	0
1	LOC105376257	uncharacterized LOC105376257	0	105376257	1380.98			423.56	1380.98	1380.98	1380.98
2	CCDC85C	coiled-coil domain containing 85C	1	317762	2266.28	3181.51	1849.08	1065.5	2266.28	2266.28	2266.28	7057.18	7609.48	8266.53	4746.81	6166.95	5739.55	7841.81	8229.43	7770.15	9653.44	6243.02	9455.4	5284.77	5625.58	10882.9	8009.23	6247.34	8834.92	3226.73	7111.81
3	PCDH1	protocadherin 1	2	5097	2375.31	1500.61	1439.79	2562.1	2375.31	2375.31	2375.31	8771.92	10804.37	8591.93	5528.66	8231.92	7060.57	4292.35	8367.98	5685.31	6692.75	4921.24	12374.59	12053.28	3506.72	8606.57	9445.61	10376.23	7949.02
4	ARHGAP23	Rho GTPase activating protein 23	2	57636	2464.02	1545.23	2200.38	2676.12	2464.02	2464.02	2464.02	4695.41	6324.9	9951.33	5270.44	3790.63	2988.63	7430.61	3345.97	3643.09	6689.91	3092.74	7590.24	5562.3	7243.46	10460.12	8248.57	9522.2	4813.12	1643.54	3106.75
5	TEAD2	TEA domain transcription factor 2	3	8463	2539.02	1912.93	1999.91	2306.1	2539.02	2539.02	2539.02	8684.62	10450.13	9513.49	5151.75	8354.39	6375.24	4446.07	4495.58	7311.99	6826.3	4331.64	7983.78	9648.48	4804.14	10831.9	11075.7	9937.62	6240.62	6400.63	7985.34	3530.33
6	FBLIM1	filamin binding LIM protein 1	3	54751	2735.36	3493.17	2546.36	1420.87	2735.36	2735.36	2735.36	12926.85	11369.35	9975.68	7867.58	12651.25	11124.62	9986.44	9535.98	10332.42	10229.6	6744.68	8917.79	12213.81	10612.91	7021.1	12165.39	11723.13	11789.23
7	CASKIN2	CASK interacting protein 2	2	57513	2918.32	2490.88	781.8	2337.44	2918.32	2918.32	2918.32	6275.36	10014.95	9287.62	3889.51	6927.59	9029.84	2572.6	4728.39	7573.95	10972.92	3914.65	4384.3	4558.42	2052.32	8605.14	7189.93	5768.97	5312.41	4118.88	2422.21
8	PHLDB1	pleckstrin homology like domain family B member 1	3	23187	2923.5	4933.48	2745.32	1084.51	2923.5	2923.5	2923.5	8178.81	12061.07	10410.31	5667.8	6653.25	10609.88	8237.6	9721.71	8459.82	8500.58	2803.71	8241.68	6443.35	11432.5	9692.59	10657	9921.51	6288.88
9	ST5	suppression of tumorigenicity 5	3	6764	2927.94	4225.96	952.19	1314.94	2927.94	2927.94	2927.94	11423.89	10575.98	9895.03	6852.35	7606.97	9265.29	6115.51	8611.69	11176.29	11261.09	4556.93	10335.11	11529.06	9487.02	10772.22	15454.57	14705.21	11359.51
10	SPTBN2	spectrin beta: non-erythrocytic 2	2	6712	3063.69	2229.35	3091.87	2879.68	3063.69	3063.69	3063.69	6593.38	9025.45	4664.07	3260.08	6601.64	4654.89	5233.32	4133.37	3910.25	6931.22	4931.6	3426.5	6624.22	5691.59	8306.6	6017.74	6426.98	5556.77	3269.17	2685.99
11	ITGB4	integrin subunit beta 4	3	3691	3102.7	1475.53	1846.1	4327.2	3102.7	3102.7	3102.7	6703.22	11770.83	10041.72	6342.55	12797.06	13487.15	8633.2	9098.27	12315.9	11588.75	7570.71	11216.02	7160.16	9207.06	8706.45	11471.46	8914.22	9147.23
12	MTSS1L	MTSS1L: I-BAR domain containing	2	92154	3108.52	3819.14	1808.86	1679.3	3108.52	3108.52	3108.52	6256.99	9963.37	9584.58	3745.86	6259.53	9151.69	7161.15	4059.67	9860.9	9764.07	4499.78	5614.23	7269.41	6479.79	10703.75	7713.46	8822.12	3743.57	1537.95	8261.42
13	VAV2	vav guanine nucleotide exchange factor 2	2	7410	3124.35	3403.28	3398.91	1931.31	3124.35	3124.35	3124.35	8415.45	10392.32	9395.62	10319.66	12948.13	11898.7	9076.61	6497.52	10483.66	7353.27	5201.96	8695.87	7521.57	8029.09	5819.24	8142.36	10134.85	6351.55	1021.97	1178.45
14	WNK2	WNK lysine deficient protein kinase 2	2	65268	3151.27	1700.26	1749.02	3926.63	3151.27	3151.27	3151.27	7945.13	8725.66	8986.07	5202.64	6340.91	10494.47	4265.12	8039.59	6226.22	12116.67	8602.01	2918.59	8097.51	6681.08	10528.83	7312.77	7799.44	7966.34	3329.2	6057.16
15	PLXNB1	plexin B1	3	5364	3203.63	3662.88	1760.28	1875.53	3203.63	3203.63	3203.63	7855.71	7489.93	7165.23	6623.15	9668.8	9728.55	5874.31	7625.29	9222.64	11532.76	4907.46	13405.72	9445.05	6646.23	10885.75	10764.19	10483.03	9598.35
16	DOK4	docking protein 4	2	55715	3213.01	1817.59	1788.33	3833.62	3213.01	3213.01	3213.01	5995.82	10559.72	10218.84	6845.13	9497.83	13528.78	7936.31	6550.4	8960.27	12226.23	3871.2	10873.91	7907.92	9617.08	7067	9216.6	9074.69	6430.25
17	CEP170B	centrosomal protein 170B	3	283638	3232.29	4518.5	908.87	1498.14	3232.29	3232.29	3232.29	8880.18	11087.81	9079.09	3836.61	8178.26	10804.48	6729.14	4396.96	6979.37	8001.7	4755.38	8234.58	6403.29	6339.87	8447.61	8143.7	7563.49	5554.83
18	AFDN	afadin: adherens junction formation factor	2	4301	3276.78	2299.07	7002.92	3191.32	3276.78	3276.78	3276.78	5754.17	5769.76	7913.19	3392.59	11331.38	4967.76	7097.02	6941.51	4867.74	12077.45	4556.18	7377.98	8469.13	4764.36	10258.7	11789.37	11673.98	5572.13	3452.42	3889.68
19	EPB41L4A-AS2	EPB41L4A antisense RNA 2 (head to head)	0	54508	3312.3	3235.72	8451.35	2302.51	3312.3	3312.3	3312.3
20	PLEKHG5	pleckstrin homology and RhoGEF domain containing G5	2	57449	3369.42	2759.11	2339.63	2814.95	3369.42	3369.42	3369.42	8082.63	10705.07	8330.72	4803.67	5069.89	6570.49	3605.68	5467.85	7974.06	9777.88	5104.49	8545.49	8273.45	5298.74	8210.15	10941.2	10006.9	6136.47	4008.65	2095.04
21	TSPAN9	tetraspanin 9	2	10867	3454.77	4503.44	3797	1733.57	3454.77	3454.77	3454.77	9595.35	9796.74	7808.96	6922.97	9407.28	10338.84	4952.25	8510.2	9186.45	11450.24	7898.89	11299.48	7715.36	5905.67	10615.76	11301.38	10210.71	6138.11	7851.63
22	BCAR1	BCAR1: Cas family scaffolding protein	3	9564	3491.89	2571.45	782.72	3243.63	3491.89	3491.89	3491.89	8406.42	10218.28	9075.79	3178.35	9727.01	9086.88	2998.19	9793.79	8221.71	9671.07	2768.94	9909.5	8106.82	8457.71	9750.52	11308.05	11505.16	9656.7	4931.15
23	DOCK6	dedicator of cytokinesis 6	2	57572	3493.78	2395.72	2653.52	3478.44	3493.78	3493.78	3493.78	6909.94	8036.5	8042.9	6004.45	7563.35	6180.2	4133.92	9103.97	4387.19	6547.85	1566.5	4907.08	5965.8	5164.09	7549.33	12767.66	12297.46	7861.77	4733.82	4271.23
24	REXO1	RNA exonuclease 1 homolog	3	57455	3512.12	1270.77	4150.96	6101.86	3512.12	3512.12	3512.12	9558.65	11851.63	5991.12	5869.48	6607.33	13012.17	6909.94	5016.82	10761.56	8259.64	7259.91	5031.82				11198.92	13287.69	10011.43	5164.93	6990.85	2956.73
25	KAZN	kazrin: periplakin interacting protein	1	23254	3599.18	4332.33	3229.87	1979.31	3599.18	3599.18	3599.18	8182.09	12546.05	9930.11	4885.21	11587.7	9047	7272.04	9205.19	8670.48	13947.02	8853.55	4416.18	8625.47	5148.03	8970.81	12683.62	9211.91	10417.78	7412.18
26	RAPGEF1	Rap guanine nucleotide exchange factor 1	2	2889	3665.82	3333.88	5283.48	2747.41	3665.82	3665.82	3665.82	9766.65	12324.52	7536.25	6263.72	10947.5	10601.73	7698.68	8687.64	10233.99	4690.62	4102.96	10835.31	7920.76	7281.42	8467.99	10534.98	11713.19	7168.93	2188.15	6955.43
27	LRP5	LDL receptor related protein 5	2	4041	3672.13	3941.15	1542.69	2299.77	3672.13	3672.13	3672.13	8309.18	5335.13	6658.92	4365.63	7055.61	6036.86	2494.93	11015.11	6257.21	8088.51	5050.98	11411.95	3385.15	5161.5	8902.12	10681.23	8103.31	7484.33	2700.27
28	AGAP1	ArfGAP with GTPase domain: ankyrin repeat and PH domain 1	2	116987	3678.03	5399.73	3073.37	1587.53	3678.03	3678.03	3678.03	7856.82	7118.6	6780.39	2146.79	4185.46	3539.87	6259.78	2332.94	1639.28	7705.16	3496.43	9329.54	5012.67	4485.35	9447.39	9912.4	7611.85	7276.28	3617.48	4984.49
29	TEAD3	TEA domain transcription factor 3	3	7005	3686.63	3335.98	1529.59	2777.6	3686.63	3686.63	3686.63	8684.62	10450.13	9513.49	5151.75	8354.39	6375.24	4446.07	4495.58	7311.99	6826.3	4331.64	7983.78	9648.48	4804.14	10831.9	11075.7	9937.62	6240.62	6400.63	7985.34	3530.33
30	PTPRF	protein tyrosine phosphatase: receptor type F	3	5792	3705.52	4232.15	2987.12	2162.64	3705.52	3705.52	3705.52	6883.84	7914.39	5353.76	5063.01	2228.99	5752.66	1291.66	6870.89	6238.21	7359.52	5190.25	4517.14	7793.23	3525.67	10110.82	8149.36	4639.99	3127.98	4217.07	454.42	3228.21
31	TMEM132A	transmembrane protein 132A	3	54972	3745.8	1666.03	1660.27	5487.06	3745.8	3745.8	3745.8	11922.29	8366.86	8436.87	4352.35	7187.19	9661.48	4373.76	6876.45	8723.19	11809.42	6835.93	9166.2	9462.39	10268.45	7940.51
32	LAMA5	laminin subunit alpha 5	3	3911	3782.68	5585.62	927.08	1615.94	3782.68	3782.68	3782.68	8364.8	8700.18	8834.87	4854.68	7797.24	8790.09	5267.51	6205.23	5824.4	6356.23	4541.08	3555.07	5801.04	5147.86	6422	6841.12	8003.29	7617.31	4677.85	7079.67	558.53
33	EFNB1	ephrin B1	3	1947	3789.84	1645	2117.19	5660.62	3789.84	3789.84	3789.84	7025.52	7530.41	8916.65	4018.36	6416.85	5515.02	5129.91	6966.05	7690.36	7415.81	4729.18	8745.57	8506.24	5412.54	8672.17	11186.16	7584.19	7388.93	7157.89	3362.16
34	B4GALNT4	beta-1:4-N-acetyl-galactosaminyltransferase 4	3	338707	3798.2	1256.12	4906.02	7010.95	3798.2	3798.2	3798.2	8174.98	12309.63	5045.35	8510.39	9639.57	13381.29	8840.76	2454.32	12113.2	13499.64	14483.03	12970.08	10462.57	11276.68	11894.86	10582.93	8031.83	6058.3
35	NECTIN1	nectin cell adhesion molecule 1	2	5818	3810.9	1602.45	2973.18	5839.15	3810.9	3810.9	3810.9	7301.17	9394.92	8945.29	7727.45	10819.17	11000.44	6646.06	2049.71	10749.02	11011.33	7880.59	8298.3				10114.42	9417.32	7076.31
36	EXD3	exonuclease 3'-5' domain containing 3	0	54932	3813.29	1448.95	6121.73		3813.29	3813.29	3813.29	12555.17	11952.96	10307.07							8453.25	9978.47	6781.26	9708.63	8794.26	10353.31	13224.52	10054.75	14116.78	5351.29	5620.04
37	SNCG	synuclein gamma	1	6623	3849.04	1909.85	7173.12	5135.88	3849.04	3849.04	3849.04	13102.24	10473.27	10706.52	11499.44	17296.94	10992.52	10665.89	9540.46	11818.15	14142.86	8661.57	7503.07				11963.22	12784.25	12673.6
38	ZCCHC14	zinc finger CCHC-type containing 14	3	23174	3913.65	4034.52	4939.07	2560.1	3913.65	3913.65	3913.65	10428.1	10313.9	7842.09	3782.19	4570.41	3248.37	7064.34	6675.96	5285.4	5394.81	7490.17	8530.96	4040.64	4156.41	10525.91	13547.31	11070.5	10884.01	3454.15
39	FOXK1	forkhead box K1	3	221937	3932.03	1994.1	4394.99	5145.41	3932.03	3932.03	3932.03	9864.06	9139.59	5789.95	6975.99	4494.15	8600.57	8647.28	7680.21	7022.45	7088.77	7946.13	6509.85	2450.87	5555.4	7688.43	9882.87	9884.19	10853.16	1804.25
40	CARD10	caspase recruitment domain family member 10	2	29775	3940.6	3389.93	3905.23	3129.29	3940.6	3940.6	3940.6	10820.18	8410.53	10953.84	4771.25	11305.16	9936.81	6475.09	9061.05	8616.31	8349.29	5912.22	8928.94	6497.16	10232	7961.77	13723.35	11450.07	8387.52
41	PPP1R13B	protein phosphatase 1 regulatory subunit 13B	2	23368	3953.76	4055.19	3417.06	2600.49	3953.76	3953.76	3953.76	8892.78	6739.26	7958.24	6633.68	10390.99	9552.93	3508.16	7921.97	7286.76	8694.36	5136.1	11750.78	6611.99	8011.77	9438.82	10539.52	11100.43	10173.25	4356.87	3981.93
42	TNKS1BP1	tankyrase 1 binding protein 1	2	85456	3958.76	2666.99	1638.41	4006.83	3958.76	3958.76	3958.76	8892.04	12176.86	5079.67	3592.31	9403.52	7021.67	3349.52	8082.57	6541.06	10058.09	3838.58	11604.35	4093.66	8842.97	7405.24
43	SEMA3F	semaphorin 3F	2	6405	3975.93	3975.01	1296.84	2689.59	3975.93	3975.93	3975.93	6914.73	7969.08	8272.42	6727.53	8101.97	7828.31	4683.07	4078.68	6591.83	10126.98	5527.66	7356.71	8090.9	5977.93	7922.13	8951.01	10725.36	4369.96
44	KIAA1217	KIAA1217	3	56243	3980.93	6887.76	2975.53	1362.71	3980.93	3980.93	3980.93	5361.85	10275.01	10102.66	2614.44	4209.35	4755.67	4470.2	4080.04	6688.41	4925.99	4848.64	6887.16	4953.19	2820.95	9186.93	7143.95	7327.79	7289.96	4268.56	8430.09
45	RAI1	retinoic acid induced 1	3	10743	3983.46	3403.18	1147.19	3185.99	3983.46	3983.46	3983.46	6077.37	12956.38	6271.34	4736.36	4888.88	10776.54	4766.01	8986.09	9993.28	8638.94	5200.26	6574.69	5124.53	5936.47	7302.84	11262.57	9225.57	7810.45
46	HR	HR: lysine demethylase and nuclear receptor corepressor	2	55806	3990.3	2669.15	2309.46	4065.99	3990.3	3990.3	3990.3	7035.34	7381.23	10956.23	4817.6	10992.9	12488.39	8185.55	10266.57	9510.85	12108.64	7404.3	12516.44	9369.49	6769.64	7185.59
47	KIAA1522	KIAA1522	2	57648	4014.09	4866.33	1427.24	2178.05	4014.09	4014.09	4014.09	8454.01	6320.71	10252.93	4528.92	10612.64	10364.67	6616.47	9486.75	10019.8	11051.81	6076.98	11600.14	7992.7	9811.13	6560.21	10822.59	8766.23	9488.42
48	RERE	arginine-glutamic acid dipeptide repeats	3	473	4014.44	4515.16	6515.85	2378.22	4014.44	4014.44	4014.44	14009.42	8022.46	8583.59	6731.44	7597.34	9387.75	5586.15	7773.62	9320.69	6431.03	5448.12	7077.87	3491.56	6349.06	8063.33	9872.38	7281.4	8412.76	1306.24	4908.13
49	MVB12B	multivesicular body subunit 12B	2	89853	4031.85	4182.02	3188.22	2617.95	4031.85	4031.85	4031.85	10562.34	6274.36	7545.38	8042.25	5034.16	14321.89	6937.09	6078.73	6318.71	9079.43	5290.57	11708.55	7456.03	8042.14	9544.12	10387.23	11367.14	8797.7	4665.14	7218.6
50	RBFOX2	RNA binding fox-1 homolog 2	2	23543	4034	3676.23	3461.82	3015.3	4034	4034	4034	7382.25	5056.32	9840.49	5434.5	7129.42	6529.96	7706.98	5096.76	3584.45	8065.64	6271.25	9771.57	8088.26	6924.8	10722.39	8703.04	8054	6232.29	5272.11	2026.56	2388.96
